# Supplementary material for: Increased β-Lactams dosing regimens improve clinical outcome in critically ill patients with augmented renal clearance treated for a first episode of hospital or ventilator-acquired pneumonia: a before and after study
Source: PubMed Central journal article supplement (PMC6881978; doi:10.1186/s13054-019-2621-4), 2019-11-27
Supplement: 13054_2019_2621_MOESM1_ESM.pdf [file 13054_2019_2621_MOESM1_ESM.pdf]

**Supplementary Data.** Distribution of therapeutic failure rates according to initial antibiotic treatment.

*Results expressed as percentages [95% confidence interval]*

|                                                       | <b>Control period</b><br><b>N = 88</b> | <b>Treatment period</b><br><b>N = 89</b> | <b>p</b> |
|-------------------------------------------------------|----------------------------------------|------------------------------------------|----------|
| <b>Piperacillin ± Tazobactam</b><br><i>N = 90</i>     | 17 [5 – 30]                            | 6 [0 – 13]                               | 0.12     |
| <b>Ceftriaxone or cefotaxime</b><br><i>N = 28</i>     | 31 [9 – 54]                            | 25 [1 – 50]                              | 0.72     |
| <b>Amoxicillin ± Clavulanic Acid</b><br><i>N = 22</i> | 22 [0 – 49]                            | 15 [0 – 35]                              | 0.68     |
| <b>Ceftazidime or Cefepime</b><br><i>N = 17</i>       | 21 [0 – 43]                            | 0 [0 – 0]                                | 0.38     |
| <b>Cefazolin</b><br><i>N = 11</i>                     | 38 [4 – 71]                            | 0 [0 – 0]                                | 0.21     |
| <b>Meropenem</b><br><i>N = 9</i>                      | 17 [0 – 46]                            | 33 [0 – 87]                              | 0.57     |
