# Supplementary material for: Increased β-Lactams dosing regimens improve clinical outcome in critically ill patients with augmented renal clearance treated for a first episode of hospital or ventilator-acquired pneumonia: a before and after study
Source: PubMed Central journal article supplement (PMC6881978; doi:10.1186/s13054-019-2621-4), 2019-11-27
Supplement: 13054_2019_2621_MOESM2_ESM.pdf [file 13054_2019_2621_MOESM2_ESM.pdf]

**Supplementary Data.** Median values of MIC according to initial antibiotic treatment. *The MIC values were provided by the local microbiology laboratory in 30 patients (17%). Results expressed as median [25 – 75 interquartile]*

|                                                       | <b>Control period</b><br>N = 88 | <b>Treatment period</b><br>N = 89 | <b>p</b>    |
|-------------------------------------------------------|---------------------------------|-----------------------------------|-------------|
| <b>Piperacillin ± Tazobactam</b><br><i>N = 90</i>     | 4 [2.5 – 4]                     | 4 [4 – 4]                         | <i>0.01</i> |
| <b>Ceftriaxone or cefotaxime</b><br><i>N = 28</i>     | 0.5 [0.4 – 0.6]                 | 0.5 [0.1 – 0.9]                   | <i>0.51</i> |
| <b>Amoxicillin ± Clavulanic Acid</b><br><i>N = 22</i> | 2 [1.8 – 3.5]                   | 2 [0.5 – 2]                       | <i>0.36</i> |
| <b>Ceftazidime or Cefepime</b><br><i>N = 17</i>       | 1 [0.5 – 1]                     | 4 [3 - 6]                         | <i>0.02</i> |
| <b>Cefazolin</b><br><i>N = 11</i>                     | 2 [2 – 2]                       | 2 [1.3 – 2]                       | <i>0.65</i> |
| <b>Meropenem</b><br><i>N = 9</i>                      | 0.4 [0.3 – 0.5]                 | 0.1 [0.1 – 0.1]                   | <i>0.14</i> |
